# Supplementary material
Source: PubMed Central journal article supplement (PMC6928558)
Supplement: Supplemental_material10.pdf [file Supplemental_material10.pdf]

*Supplementary Table 1. Demography of healthy controls*

| <b>Subject<br/>number</b> | <b>Age<br/>group</b> | <b>Sex</b> |
|---------------------------|----------------------|------------|
| H01                       | 50-65                | M          |
| H02                       | 20-34                | F          |
| H03                       | 50-65                | M          |
| H04                       | 35-49                | F          |
| H05                       | 20-34                | F          |
| H06                       | 20-34                | M          |
| H07                       | 20-34                | M          |
| H08                       | 35-49                | F          |
| H09                       | 35-49                | M          |
| H10                       | 50-65                | F          |

M: male, F: female, Age group in years. Healthy controls were selected to match the age group of the TBI patients.

*Supplementary Table 2. CRASH predictions for the TBI patients*

| <b>Subject number</b> | <b>CRASH prediction of unfavourable outcome</b> |
|-----------------------|-------------------------------------------------|
| P01                   | 42 %                                            |
| P02                   | 90 %                                            |
| P03                   | 31 %                                            |
| P04                   | 74 %                                            |
| P05                   | 86 %                                            |
| P06                   | 22 %                                            |
| P07                   | 39 %                                            |
| P08                   | 31 %                                            |
| P09                   | 69 %                                            |
| P10                   | 83 %                                            |
| P11                   | 35 %                                            |
| P12                   | 28 %                                            |
| P13                   | 46 %                                            |

Risk of unfavourable outcome at six months calculated using online head injury prognosis calculator based on data from the CRASH trial (Corticosteroid Randomisation After Significant Head Injury). <http://www.trialscoordinatingcentre.lshtm.ac.uk/Risk%20calculator/index.html>
